# Supplementary material for: A Frameshift Mutation in wcaJ Associated with Phage Resistance in Klebsiella pneumoniae
Source: PubMed Central journal article supplement (PMC7142929; doi:10.3390/microorganisms8030378), 2020-03-07
Supplement: microorganisms-08-00378-s001.pdf [file microorganisms-08-00378-s001.pdf]

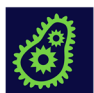

Table S1. Bacterial strains, bacteriophage and plasmids.

| Strains, phage or plasmid    | Genotype or relevant markers         | Reference |
|------------------------------|--------------------------------------|-----------|
| <i>Klebsiella pneumoniae</i> |                                      |           |
| Kp36                         | wild-type                            | [6]       |
| Kp36-117R                    | phage 117 resistant mutant           | [6]       |
| <i>Escherichia coli</i>      |                                      |           |
| DH5α                         | Competent cells                      |           |
| Phage                        |                                      |           |
| phage 117                    | Genome 41,092 bp, <i>Podoviridae</i> | [6]       |
| Phage 31                     | Genome 39,600 bp, <i>Podoviridae</i> | [6]       |
| Plasmid                      |                                      |           |
| pBAD33                       | <i>wcaJ</i> complementation assay    | [17]      |
| pSGKP-spe                    | <i>wcaJ</i> knockout                 | [16]      |
| pCasKP                       | <i>wcaJ</i> knockout                 | [16]      |

Table S2. Primer list.

| Name                        | Primers (5'-3')                                                                                 |
|-----------------------------|-------------------------------------------------------------------------------------------------|
| <i>wcaJ</i> check           |                                                                                                 |
| <i>wcaJ</i> _check_F        | CCCTGCCATGGTTATGGTGAG                                                                           |
| <i>wcaJ</i> _check_R        | CTCCTGTCAGGTGTGGTCAC                                                                            |
| <i>wcaJ</i> deletion        |                                                                                                 |
| delta <i>wcaj</i> _1        | TTTAAGCTTGATATCTTGACAGCTAGCTCAGTCCTAGGTATAATA<br>-CTAGTAGACAAATACGATATGGTA;GTTTTAGAGCTAGAAATAGC |
| delta <i>wcaj</i> _2        | TTTGAGCTCCACCGCGGTGGCGG                                                                         |
| delta <i>wcaj</i> _3        | TTTGAGCTCGGGATTATCGAACGGCAAATGGAG                                                               |
| delta <i>wcaj</i> _4        | GTATCATAATTCGTACAATAGAAATCTCACCATAACCATGGCAGGG<br>TATTG                                         |
| delta <i>wcaj</i> _5        | GGTTATGGTGAGATTTCTATTGTACGAATTATGATACTTAATCTTTTT<br>TGTTGAGG                                    |
| delta <i>wcaj</i> _6        | TTTGAGCTCCCTTCGGCAGACAGCTCACGG                                                                  |
| <i>wcaJ</i> complementation |                                                                                                 |
| <i>wcaJ</i> comple_F        | TTTTCTAGATAAGGAGGTATCATATGAAAACCTTTCACGCATCGTGC                                                 |
| <i>wcaJ</i> comple_R        | TTTAAGCTTTCAATATGCAGACTTATTAATAAACCC                                                            |
